# Supplementary material for: Gelatin and sodium alginate derived carbon/silicon composites as high-performance anode materials for lithium-ion batteries
Source: Royal Society of Chemistry journal article supplement (doi:10.1039/d4dt02623c), 2024-01-01
Supplement: d4dt02623c1.pdf [file d4dt02623c1.pdf]

# Supplementary

for

## **Gelatin and sodium alginate derived carbon/silicon composites as high-performance anode materials for lithium-ion batteries**

Liyang Lin<sup>a,b</sup>, Mengjun Li<sup>a,b</sup>, Ying Yan<sup>d</sup>, Yuanhao Tian<sup>d</sup>, Juan Qing<sup>a</sup>, Susu Chen<sup>c,\*</sup>

<sup>a</sup> School of Aeronautics, Chongqing Jiaotong University, Chongqing 400074, China

<sup>b</sup> Chongqing Key Laboratory of Green Aviation Energy and Power, Chongqing Jiaotong University, Chongqing 400074, China

<sup>c</sup> Chongqing College of Mobile Communication, Chongqing 401520, China

<sup>d</sup> Southwest Technology and Engineering Research Institute, Chongqing 400039, China

---

\* Corresponding authors.  
E-mail addresses: susuchen@cqu.edu.cn (S. Chen).

**Figure S1**

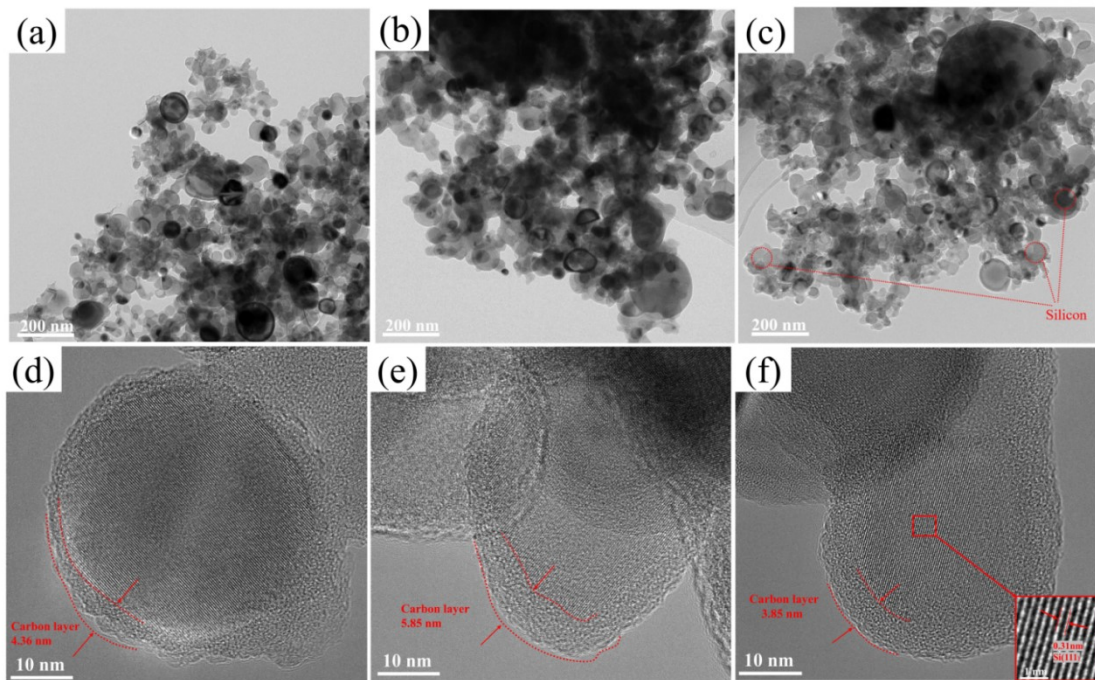

**Fig. S1** (a,b,c) TEM images of Si@C-G、Si@C-S and Si@C-GS. (d,e,f) HRTEM images of Si@C-G、Si@C-S and Si@C-GS.

**Figure S2**

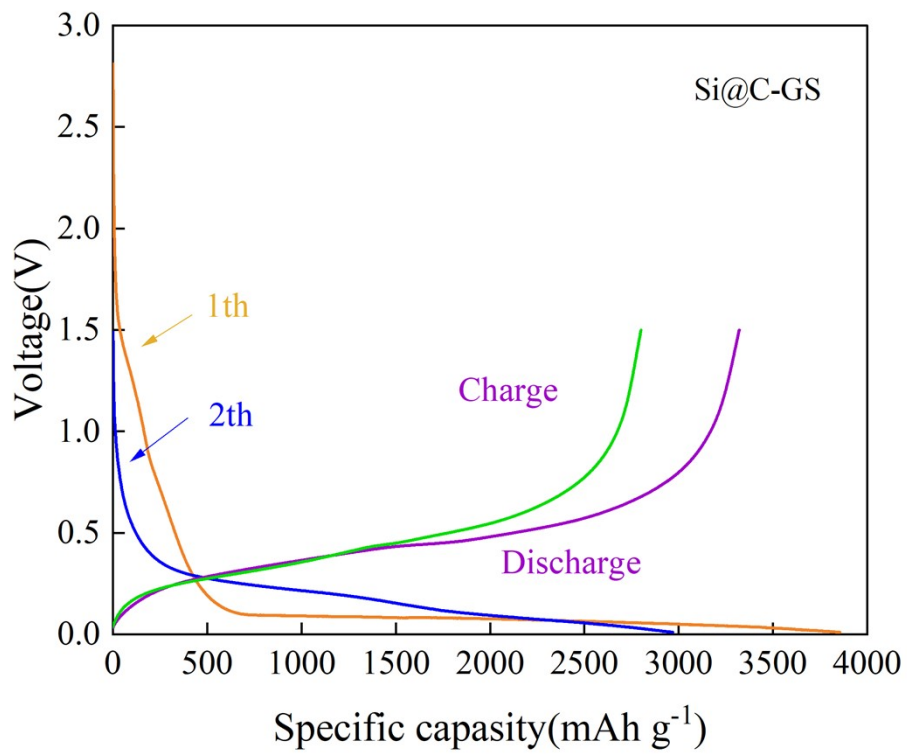

**Fig. S2** Pre-cycling charge/discharge curves of Si@C-GS at a current density of 0.1 A g<sup>-1</sup>.
